# Supplementary material for: Incidence, Predictors, and Outcomes of In‐Hospital Cardiac Arrest in COVID‐19 Patients Admitted to Intensive and Non‐Intensive Care Units: Insights From the AHA COVID‐19 CVD Registry
Source: PubMed Central journal article supplement — J Am Heart Assoc. 2021 Aug 11;10(16):e021204. doi: 10.1161/JAHA.120.021204 (PMC8475028; doi:10.1161/jaha.120.021204), 2021-08-11

# **SUPPLEMENTAL MATERIAL**

**Table S1. Characteristics of the hospitals included in the registry.**

| <b>Hospital characteristics</b> | <b>n(%)</b> |
|---------------------------------|-------------|
| Hospital location               |             |
| - Urban                         | 80 (90.9)   |
| - Rural                         | 3 (3.3)     |
| - Unknown                       | 5 (5.8)     |
| Hospital type                   |             |
| - Teaching                      | 71 (80.6)   |
| - Non-teaching                  | 12 (13.6)   |
| - Unknown                       | 5 (5.8)     |
| Hospital size                   |             |
| - Large ( $\geq 400$ )          | 43 (48.9)   |
| - Medium (100-399)              | 34 (38.6)   |
| - Small ( $< 100$ )             | 11 (12.5)   |
| ICU bed size                    |             |
| - $< 25$                        | 4 (4.6)     |
| - 25-50                         | 8 (9.1)     |
| - $> 50$                        | 17 (19.3)   |
| - Unknown                       | 59 (67)     |

**Table S2. Baseline characteristics supplement.**

| Variables                                          | Total cohort | Non-ICU patients       |                     |                  | ICU patients           |                     |                  |
|----------------------------------------------------|--------------|------------------------|---------------------|------------------|------------------------|---------------------|------------------|
|                                                    |              | Without cardiac arrest | With cardiac arrest | P-value          | Without cardiac arrest | With cardiac arrest | P-value          |
| <b>Race n(%)</b>                                   |              | 5946                   | 134                 |                  | 2063                   | 375                 |                  |
| Native American                                    | 34 (0.4)     | 18 (0.3)               | 0                   | -                | 14 (0.7)               | 2 (0.5)             | 0.10             |
| Asian                                              | 463 (5.5)    | 322 (5.4)              | 1 (0.7)             | <b>0.02</b>      | 122 (5.9)              | 18 (4.8)            | 0.39             |
| Pacific islander                                   | 23 (0.3)     | 17 (0.3)               | 0                   | -                | 5 (0.2)                | 1 (0.3)             | 0.93             |
| Not documented                                     | 657 (7.7)    | 504 (8.5)              | 16 (11.9)           | <b>0.16</b>      | 100 (4.8)              | 37 (9.9)            | <b>&lt;0.001</b> |
| <b>Prior medication use</b>                        |              |                        |                     |                  |                        |                     |                  |
| - Statin use                                       | 2891 (97.3)  | 1966 (33.1)            | 54 (40.3)           | 0.37             | 710 (34.4)             | 161 (42.9)          | 0.99             |
| - ACE/ARB use                                      | 2191 (53.3)  | 1471 (24.7)            | 36 (26.9)           | 0.38             | 564 (27.3)             | 120 (32)            | 0.33             |
| - Mineralocorticoid antagonist                     | 42 (1.02)    | 28 (0.5)               | 1 (0.7)             | 0.99             | 12 (0.6)               | 1(0.3)              | 0.63             |
| - Aspirin only                                     | 1752 (82.8)  | 1185 (19.9)            | 42 (31.3)           | 0.99             | 451 (21.9)             | 74 (19.7)           | 0.28             |
| - Anticoagulant                                    | 1064 (13)    | 694 (11.7)             | 31 (23.1)           | <b>&lt;0.001</b> | 283 (13.7)             | 56 (14.9)           | 0.88             |
| - Insulin use                                      | 1066 (47.2)  | 687 (11.6)             | 24 (17.9)           | 0.26             | 285 (13.8)             | 70 (18.7)           | 0.77             |
| - Steroid use (inhaled/ oral)                      | 1025 (12)    | 644 (10.8)             | 13 (9.7)            | 0.78             | 315 (15.3)             | 53 (14.1)           | 0.63             |
| - Non steroid immunosuppressive /chemotherapy      | 395 (4.6)    | 262 (4.4)              | 6 (4.5)             | 0.99             | 106 (5.1)              | 21 (5.6)            | 0.81             |
| - Hydroxychloroquine                               | 409 (4.8)    | 262 (4.4)              | 7 (5.2)             | 0.81             | 122 (5.9)              | 18 (4.8)            | .46              |
| <b>Past medical history</b>                        |              |                        |                     |                  |                        |                     |                  |
| - Peripheral artery disease                        | 225 (2.6)    | 141 (2.4)              | 5 (3.7)             | 0.46             | 64 (3.1)               | 15 (4)              | 0.46             |
| - Hyperlipidemia                                   | 2932 (34.4)  | 1944 (32.7)            | 49 (36.6)           | 0.39             | 798 (38.7)             | 141 (37.6)          | 0.74             |
| - Chronic pulmonary disease                        | 1381 (16.2)  | 906 (15.2)             | 20 (14.9)           | 0.99             | 388 (18.8)             | 67 (17.9)           | 0.72             |
| - Smoking or e-cigarette (vaping)                  | 533 (6.3)    | 350 (5.9)              | 11 (8.2)            | 0.35             | 140 (6.8)              | 32 (8.5)            | 0.27             |
| <b>Associated diagnoses during hospitalization</b> |              |                        |                     |                  |                        |                     |                  |
| - Supraventricular arrhythmia                      | 89 (1.1)     | 17 (0.3)               | 1 (0.7)             | 0.86             | 31 (1.5)               | 40 (10.7)           | <b>&lt;0.001</b> |
| - Atrial fibrillation                              | 699 (8.2)    | 321 (5.4)              | 24 (17.9)           | <b>&lt;0.001</b> | 272 (13.2)             | 82 (21.9)           | <b>&lt;0.001</b> |
| - Acute MI/PCI                                     | 51 (0.59)    | 10(0.2)                | 1 (0.7)             | 0.44             | 29 (1.4)               | 11 (2.9)            | <b>0.004</b>     |
| - In-hospital shock                                | 1057 (12.9)  | 54 (0.9)               | 30(22.4)            | <b>&lt;0.001</b> | 706 (34.2)             | 267 (71.2)          | <b>&lt;0.001</b> |
| - New onset heart failure                          | 127 (1.5)    | 34 (0.6)               | 2 (1.5)             | 0.42             | 58 (2.8)               | 33 (8.8)            | <b>&lt;0.001</b> |
| - Myocarditis                                      | 28 (0.33)    | 8 (0.1)                | 0                   | 1.0              | 10 (0.5)               | 10 (2.7)            | <b>0.004</b>     |

|                                           |              |              |               |                  |              |               |                  |
|-------------------------------------------|--------------|--------------|---------------|------------------|--------------|---------------|------------------|
| - PE/DVT                                  | 280 (3.29)   | 80 (1.3)     | 2 (1.5)       | 1.0              | 169 (8.2)    | 29 (7.7)      | 0.85             |
| - Clinical bleeding requiring transfusion | 255 (3)      | 61 (1)       | 3 (2.2)       | 0.35             | 147 (7.1)    | 44 (11.7)     | <b>0.004</b>     |
| - New Hemodialysis or CRRT                | 334 (3.9)    | 13 (0.20)    | 0             | 1.0              | 233 (11.3)   | 88 (23.5)     | <b>&lt;0.001</b> |
| - Ischemic or hemorrhagic stroke          | 104 (1.2)    | 26 (0.4)     | 0             | 0.92             | 58 (2.8)     | 20 (5.3)      | <b>0.02</b>      |
| <b>Baseline laboratory</b>                |              |              |               |                  |              |               |                  |
| - Mean Serum Creatinine (mg/dl) (SD)      |              | 1.72 (6.19)  | 2.42 (2.31)   | <b>&lt;0.001</b> | 1.94 (4.42)  | 2.40 (5.56)   | <b>&lt;0.001</b> |
| - Troponin (ng/ml)                        |              | 4.51 (21.96) | 34.96 (60.29) | <b>&lt;0.001</b> | 3.96 (26.47) | 13.67 (58.81) | <b>&lt;0.001</b> |
| <b>Management prior to cardiac arrest</b> |              |              |               |                  |              |               |                  |
| - Inotropes                               | 720 (8.5)    | 39 (0.7)     | 9 (6.7)       | <b>&lt;0.001</b> | 644 (31.2)   | 28 (7.5)      | <b>&lt;0.001</b> |
| - Mechanical ventilation                  | 1496 (17.6%) | 76 (1.3)     | 11 (8.2)      | <b>&lt;0.001</b> | 1305 (63.3)  | 104 (27.7)    | <b>&lt;0.001</b> |
| - Glucocorticoid                          | 1703 (21.6)  | 821 (13.8)   | 17 (12.7)     | 0.97             | 712 (34.5)   | 153 (40.8)    | <b>&lt;0.001</b> |
| - Hydroxychloroquine                      | 3723 (44.9)  | 2411 (40.6)  | 69 (51.5)     | <b>0.004</b>     | 1039 (50.4)  | 203 (54.1)    | <b>0.02</b>      |
| - Remdesivir                              | 654 (7.9)    | 350 (5.9)    | 3 (2.2)       | 0.10             | 273 (13.2)   | 28 (7.5)      | <b>0.002</b>     |

**Table S3. Discharge location of patients with cardiac arrest.**

| <b>Discharge location</b>  | <b>N (%)</b> |
|----------------------------|--------------|
| Discharged home            | 11 (2.2)     |
| Hospice                    | 1 (0.2)      |
| Acute care facility        | 6 (1.2)      |
| Other health care facility | 15 (2.9)     |
| AMA                        | 1 (0.2)      |

**Table S4. Predictors of survival to discharge in patients with cardiac arrest.**

| <b>Variables</b>                     | <b>Odds ratio</b> | <b>Confidence Interval</b> | <b>P-value</b> |
|--------------------------------------|-------------------|----------------------------|----------------|
| Age group (compared to <50)          |                   |                            |                |
| - 50-59                              | 0.69              | 0.21-2.14                  | 0.49           |
| - 60-69                              | 2.04              | 0.59-6.98                  | 0.26           |
| - 70-79                              | 5.69              | 1.26-25.71                 | <b>0.02</b>    |
| - ≥80                                | 21.67             | 2.19-214.63                | <b>0.008</b>   |
| Sex (Female compared to male)        | 1.20              | 0.52-2.77                  | 0.66           |
| Race (reference non-Hispanic whites) |                   |                            |                |
| - Hispanic                           | 2.13              | 0.76-5.94                  | 0.15           |
| - Non-Hispanic Black                 | 2.28              | 0.81-6.45                  | 0.12           |
| BMI category (≥30 compared to <30)   | 1.13              | 0.38-5.11                  | 0.77           |
| Severity score                       |                   |                            |                |
| qSOFA                                | 2.35              | 0.58-0.51                  | 0.23           |
| Comorbidities                        |                   |                            |                |
| - Prior MI/ PCI or CABG              | 4.27              | 0.14-1.34                  | 0.14           |
| - Hypertension                       | 0.29              | 0.09-1.01                  | 0.90           |
| - Hyperlipidemia                     | 0.85              | 0.37-1.97                  | 0.71           |
| - Congestive heart failure           | 1.06              | 0.31-3.61                  | 0.93           |
| - Chronic kidney disease/ESRD        | 1.47              | 0.50-4.37                  | 0.48           |
| - Diabetes                           | 0.85              | 0.38-1.91                  | 0.70           |
| - Chronic lung disease               | 1.06              | 0.35-3.21                  | 0.91           |
| - Smoker/ e-cigarette user           | 2.25              | 0.45-11.16                 | 0.32           |

Figure S1. Distribution of total cohort by state.

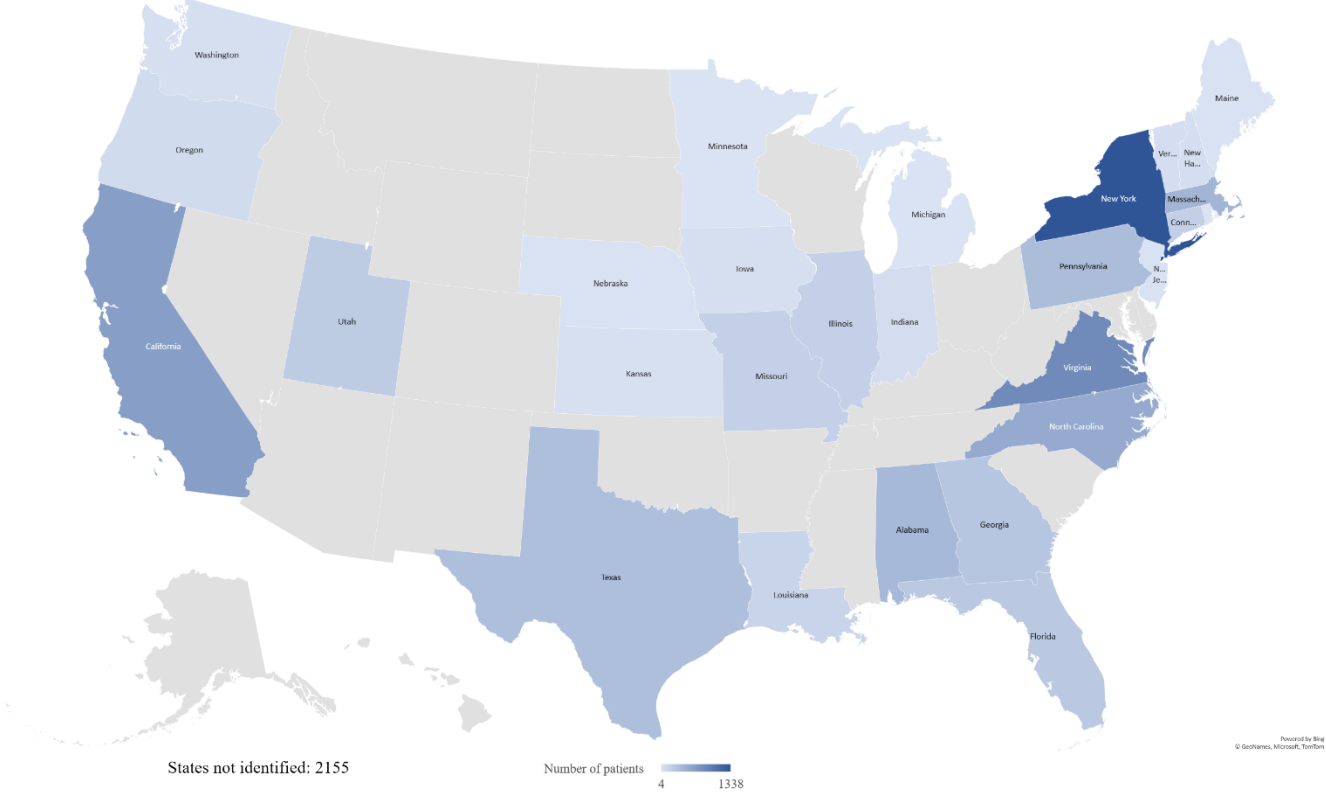

Figure S2. Incidence of in-hospital cardiac arrest (IHCA) and survival to discharge among patients with IHCA according to hospital characteristics.

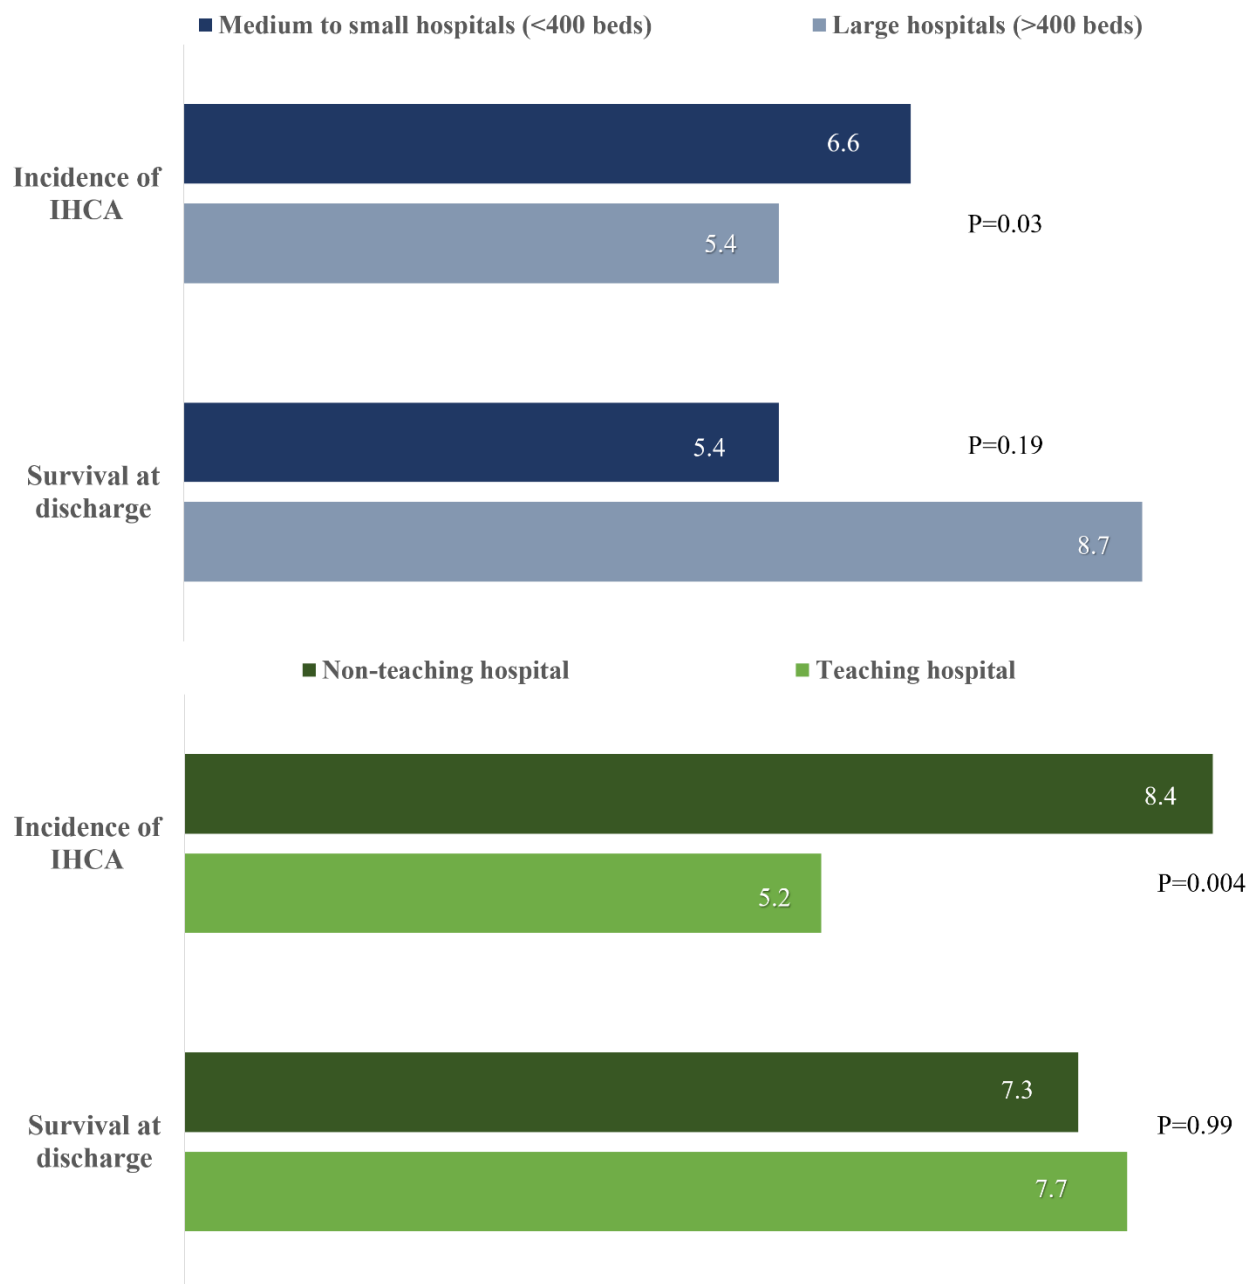

Supplement: JAH3-10-e021204-s001.pdf [file JAH3-10-e021204-s001.pdf]
